# Supplementary material for: Impact of regular televisits on unplanned hospital admissions of nursing home residents in rural Germany: a pre-post intervention study
Source: Research Square preprint supplement (doi:10.21203/rs.3.rs-5448947/v1), 2025-04-10
Supplement: Supplementary file 1 [file 54cb4374c8a59766fdc2488e.docx]

Reporting guideline based on the STROBE Statement.

| |  | Item | Recommendation | Page(s) | | --- | --- | --- | --- | | **Title and abstract** | 1 | (*a*) Indication of the study’s design with a commonly used term in the title or the abstract | 1 | | (*b*) Provision of an informative and balanced summary of what was done and what was found in the abstract | 2 | | Introduction | | |  | | Background/rationale | 2 | Explanation of the scientific background and rationale for the investigation being reported | 3-5 | | Objectives | 3 | Statement of specific objectives, including any prespecified hypotheses | 5 | | Methods | | |  | | Study design | 4 | Presentation of key elements of study design early in the paper | 6 | | Setting | 5 | Description of the setting, locations, and relevant dates, including periods of recruitment, exposure, follow-up, and data collection | 7 | | Participants | 6 | Eligibility criteria, and the sources and methods of selection of participants. Description of follow-up methods | 6 | | Variables | 7 | Clear definition of all outcomes, exposures, predictors, potential confounders, and effect modifiers. | 6-9 | | Data sources/ measurement | 8 | For each variable of interest, giving sources of data and details of methods of assessment (measurement). Description of comparability of assessment methods if there is more than one group | 9,10 | | Bias | 9 | Description of any efforts to address potential sources of bias | 9,10 | | Study size | 10 | Explanation on how the study size was arrived at | 6,7 | | Quantitative variables | 11 | Explanation on how quantitative variables were handled in the analyses. If applicable, describe which groupings were chosen and why | 9,10 | | Statistical methods | 12 | (*a*) Description of all statistical methods, including those used to control for confounding | 9,10 | | (*b*) Description of any methods used to examine subgroups and interactions | 9,10 | | (*c*) Explanation on how missing data were addressed | 10 | | Results | | |  | | Participants | 13 | Reporting of numbers of individuals at each stage of study—eg numbers potentially eligible, examined for eligibility, confirmed eligible, included in the study, completing follow-up, and analysed | 10,11 | | Descriptive data | 14 | (a) Giving characteristics of study participants (eg demographic, clinical, social) and information on exposures and potential confounders | 10-13 | | (b) Indication of number of participants with missing data for each variable of interest | 12-15 | | (c) Summarising of follow-up time (eg, average and total amount) | 13-15 | | Outcome data | 15 | Reporting of numbers of outcome events or summary measures over time | 13-15 | | Main results | 16 | Giving unadjusted estimates and, if applicable, confounder-adjusted estimates and their precision (eg, 95% confidence interval). Making clear which confounders were adjusted for and why they were included | 13-15 | | Other analyses | 17 | Reporting of other analyses done—eg analyses of subgroups and interactions, and sensitivity analyses | 15 | | Discussion | | |  | | Key results | 18 | Summarising key results with reference to study objectives | 16 | | Limitations | 19 | Discussion of limitations of the study, taking into account sources of potential bias or imprecision. Discussion of both direction and magnitude of any potential bias | 17-19 | | Interpretation | 20 | Giving a cautious overall interpretation of results considering objectives, limitations, multiplicity of analyses, results from similar studies, and other relevant evidence | 16-20 | | Generalisability | 21 | Discussion of the generalisability (external validity) of the study results | 18,19 | | Other information | | |  | | Funding | 22 | Giving the source of funding and the role of the funders for the present study and, if applicable, for the original study on which the present article is based | 22 | |
| --- | --- | --- | --- | --- | --- | --- | --- | --- | --- | --- | --- | --- | --- | --- | --- | --- | --- | --- | --- | --- | --- | --- | --- | --- | --- | --- | --- | --- | --- | --- | --- | --- | --- | --- | --- | --- | --- | --- | --- | --- | --- | --- | --- | --- | --- | --- | --- | --- | --- | --- | --- | --- | --- | --- | --- | --- | --- | --- | --- | --- | --- | --- | --- | --- | --- | --- | --- | --- | --- | --- | --- | --- | --- | --- | --- | --- | --- | --- | --- | --- | --- | --- | --- | --- | --- | --- | --- | --- | --- | --- | --- | --- | --- | --- | --- | --- | --- | --- | --- | --- | --- | --- | --- | --- | --- | --- | --- | --- | --- | --- | --- | --- | --- | --- | --- | --- | --- | --- | --- | --- | --- | --- |
